# Supplementary material for: Inducing cellular senescence in vitro by using genetically encoded photosensitizers
Source: PubMed Central journal article supplement (PMC5115900; doi:10.18632/aging.101065), 2016-10-14
Supplement: aging-08-2449-s001.pdf [file aging-08-2449-s001.pdf]

## SUPPLEMENTARY MATERIAL

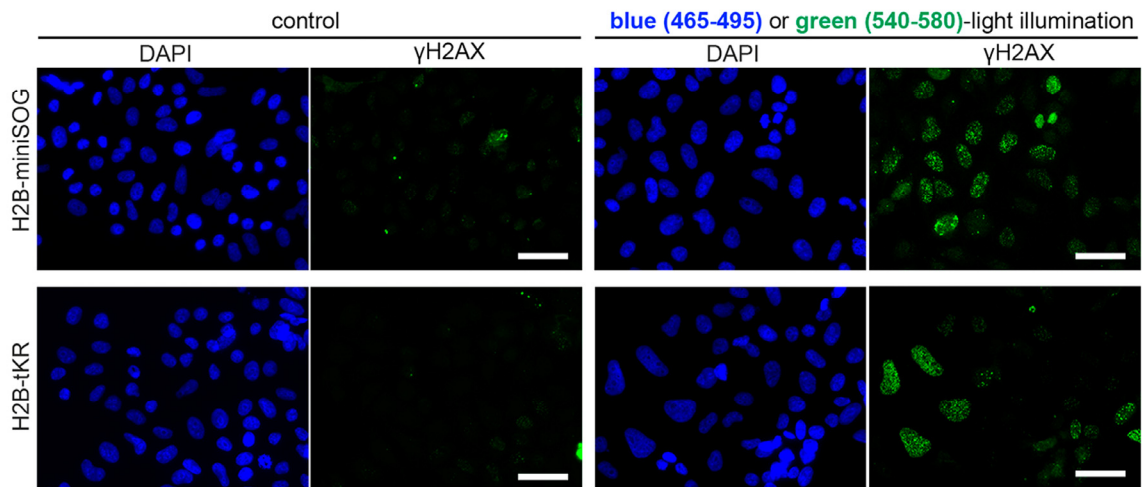

**Figure S1.** Human HeLa cells were transiently transfected either with H2B-miniSOG or H2B-tKR, synchronized in S phase, illuminated with an appropriate light, allowed to recover for 48 hours, and immunostained for  $\gamma$ H2AX. Controls represent the cells that were transfected, synchronized and released for 48 hr (non-illuminated). The DNA was stained with DAPI. Scale bar: 30  $\mu$ m.
